# Supplementary material
Source: PubMed Central journal article supplement (PMC3393088)
Supplement: NIHMS224272-supplement-1.pdf [file NIHMS224272-supplement-1.pdf]

## Supplemental Information

Supplemental Table 1a and b. **Damage-induced phosphorylation sites.**

**a**, Identification of damage-induced Sld3 and Dbf4 phosphorylation sites *in vivo* and *in vitro* Rad53 phosphorylation sites on recombinant Sld3 and Sld3-m25 by mass spectrometry. Sld3 sites T607, T609, T631 and T638 were not mapped. In **b**, sites in bold were mapped *in vivo*.

Supplemental Figure 1. **Molecular model of Rad53-dependent regulation of late origin firing.** **a**, Origin firing requires the CDK-dependent phosphorylation of Sld3 and Sld2, as well as the DDK-dependent phosphorylation of the MCMs. CDK-phosphorylated Sld3 and Sld2 bind Dpb11 and collectively promote recruitment of pre-initiation complex (pre-IC) to facilitate origin firing. **b**, Upon intra-S-phase checkpoint activation, Rad53 prevents late origin firing by phosphorylating Sld3 and Dbf4. Rad53 inhibits an Sld3-Dpb11 interaction and possibly prevents recruitment of other pre-IC components.

Supplemental Figure 2. **Damage-induced phosphorylation sites.**

**a**, Sld3 illustration indicating mutated sites (set 3: T451A, S456A, S463A, S466A; set 4: S493A, T495A, S497A, S505A, T507A; Set 5: T582A, S591A; Set 6: S639A, T642A, T646A; *sld3-m20*: set 1-6 + S521A S534A; *SLD3-m25*: *sld3-m20* + T607A T609A T618A T613A T638A). **b**, Immunoblot of Sld3 and Rad53 from cells expressing wild-type or mutant Sld3-3Flag in the presence or absence of 0.05% MMS for 90 minutes.

Supplemental Figure 3. ***SLD3-m25 dbf4-m25* cells are wild-type for growth.** **a**, Representative tetrads from an *SLD3/SLD3-m25 DBF4/dbf4-m25 MCM5/mcm5-bob1* heterozygote. **b**, Flow cytometry of wild-type, *SLD3-m25*, *dbf4-m25*, and *SLD3-m25 dbf4-m25* cells synchronized in G1 with  $\alpha$ -factor and released into medium without  $\alpha$ -factor at 30°C.

Supplemental Figure 4. **Growth assay of *SLD3-m25 dbf4-m25* cells.** **a**, 5-fold serial dilutions of wild-type or mutant cells in two strain backgrounds (s288c and w303) grown at 20°, 23°, 30°, 32°, and 37°C. **b**, 5-fold serial dilutions of wild-type or mutant strains grown on 0 mM, 100 mM, or 200 mM HU, as in Fig. 3c, but in w303 cells. In this strain background, *SLD3-m25* cells are partially HU-sensitive.

Supplemental Figure 5. ***sld3-m20*  $\Delta$ 109N-*dbf4* cells are intra-S-phase checkpoint deficient.**

**a**, Flow cytometry of wild-type, *rad53* $\Delta$ , *SLD3-m25 dbf4-m25*, *sld3-m20 dbf4-m25*, and *sld3-m20*  $\Delta$ 109N-*dbf4* cells synchronized in G1 with  $\alpha$ -factor and released into 0.033% MMS at 30°C. **b**, 5-fold serial dilutions of wild-type or mutant strains grown on 0 mM and 100 mM.

Supplemental Figure 6. **Inappropriate firing of a late origin.** **a**, Schematic illustrating relevant replication structures and their corresponding migration pattern after two-dimensional gel electrophoresis. **b** and **c**, Time-course analysis

of replication intermediates from *SLD3 DBF4*, *SLD3-m25 DBF4*, *SLD3 dbf4-m25*, *SLD3-m25 dbf4-m25*, and *rad53* cells (w303) synchronously released into 200 mM HU. DNA was prepared from each time-point and probed for **b**, ARS305 (early origin) or **c**, ARS609 (late origin).

Supplemental Figure 7. **An Sld3 phosphorylation mimic has a slow S-phase.** **a.** Flow cytometry of *SLD3 DBF4*, *rad53Δ*, *SLD3-m25*, *SLD3-m25 dbf4-m25* cells or the phosphorylation mimic *sld3-m21D* synchronously released into medium containing 0.033% MMS. **b.** Immunoblot of samples from Fig. 3b, probed for Rad53. “MMS” are control samples from cells treated with 0.05% MMS for 90 minutes. **c.** Two-dimensional gel electrophoresis of asynchronous cells expressing either *SLD3-3Flag* or the phosphorylation mimic, *sld3-m21D*. DNA was digested with EcoR1 and probed for the early origin ARS305.

Supplemental Figure 8. **Sld3-Dpb11 fusion cells are intra-S-phase checkpoint competent.** Flow cytometry of wild-type, *rad53Δ*, *SLD3-m25*, and *sld3-dpb11* fusion cells synchronized in G1 with  $\alpha$ -factor and released into 0.033% MMS at 30°C .

Supplemental Figure 9. ***SLD3-m25* is epistatic to *rad53* mutant cells.** **a.** 5-fold serial dilutions of wild-type or mutant strains grown on 0 mM, 7 mM, 10 mM HU for epistasis analysis. The *rad53-R70,R605* allele has mutations in the FHA1 and FHA2 domains, respectively, and lacks all checkpoint function, but is proficient for Rad53's checkpoint-independent role in DNA replication<sup>30</sup>. (See Supplemental methods) **b.** Growth curves of wild-type or mutant strains grown asynchronously in the presence of 0 mM, 12.5 mM, 25 mM, or 50 mM HU for three hours at 30°C. For each concentration, ~200 cells were plated and grown for 3 days at 30°C. **c.** Immunoblots from asynchronous cells grown in the presence or absence of 0.05% MMS for 90 minutes.

Supplemental Figure 10, 11, 12. **Rad52-GFP Foci.** Representative cells from *in vivo* fluorescent microscopy of Rad52-GFP foci in wild-type (Supplemental Fig. 10), *SLD3-m25 dbf4-m25* (Supplemental Fig. 11) and *rad53Δ* (Supplemental Fig. 12) strains arrest in G1 with  $\alpha$ -factor and released into 200 mM HU for 2 hours.

## Supplemental Table S2

| strain  | genotype                                                                                                                                                                                                                                            | source     |
|---------|-----------------------------------------------------------------------------------------------------------------------------------------------------------------------------------------------------------------------------------------------------|------------|
| yJLO18  | <i>SLD3-3Flag::HygroR his3Δ1 leu2Δ0 met15Δ0 ura3Δ</i><br><i>pGAL1-10-URA3-SLD3-3Flag::HygroR his3Δ1 leu2Δ0 met15Δ0</i>                                                                                                                              | this study |
| yJLO23  | <i>ura3Δ</i><br><i>SLD3-3Flag::HygroR rad53Δ::KanMx sml1Δ::LEU2his3Δ1 leu2Δ0</i><br><i>met15Δ0 ura3Δ</i>                                                                                                                                            | this study |
| yJLO20  | <i>met15Δ0 ura3Δ</i>                                                                                                                                                                                                                                | this study |
| yNLM133 | <i>SLD3-m25-3Flag::HygroR his3Δ1 leu2Δ0 met15Δ0 ura3Δ</i>                                                                                                                                                                                           | this study |
| yJLO92  | <i>mcm5-bob1 his3Δ1 leu2Δ0 met15Δ0 ura3Δ</i><br><i>SLD3/SLD3-m25-3Flag::HygroR DBF4/dbf4Δ::KanMx</i>                                                                                                                                                | this study |
| yJLO110 | <i>MCM5/mcm5-bob1</i><br><i>SLD3/SLD3-m25-3Flag::HygroR DBF4/dbf4-</i><br><i>m25::LEU2::dbf4Δ::KanMx MCM5/mcm5-bob1</i>                                                                                                                             | this study |
| yJLO119 | <i>SLD3-m25-3Flag::HygroR dbf4-m25::LEU2::dbf4Δ::KanMx</i>                                                                                                                                                                                          | this study |
| yJLO123 | <i>dbf4-m25::LEU2::dbf4Δ::KanMx</i>                                                                                                                                                                                                                 | this study |
| yJLO124 | <i>Rad52-GFP::HIS3 SLD3-m25-3Flag::HygroR dbf4-</i><br><i>m25::LEU2::dbf4Δ::KanMx his3Δ1 leu2Δ0 met15Δ0 ura3Δ</i>                                                                                                                                   | this study |
| yJLO155 | <i>Rad52-GFP::HIS3 SLD3-m25-3Flag::HygroR his3Δ1 leu2Δ0</i><br><i>met15Δ0 ura3Δ</i>                                                                                                                                                                 | this study |
| yJLO156 | <i>Rad52-GFP::HIS3 dbf4-m25::LEU2::dbf4Δ::KanMx his3Δ1 leu2Δ0</i><br><i>met15Δ0 ura3Δ</i>                                                                                                                                                           | this study |
| yJLO157 | <i>met15Δ0 ura3Δ</i><br><i>Rad52-GFP::HIS3 rad53Δ::KanMx sml1Δ::LEU2 his3Δ1 leu2Δ0</i><br><i>met15Δ0 ura3Δ</i>                                                                                                                                      | this study |
| yJLO158 | <i>met15Δ0 ura3Δ</i><br><i>SLD3-m25-3Flag::HygroR dbf4-m25::LEU2::dbf4Δ::KanMx</i>                                                                                                                                                                  | this study |
| yJLO159 | <i>rad52Δ::KanMx his3Δ1 leu2Δ0 met15Δ0 ura3Δ</i><br><i>SLD3-m25-3Flag::HygroR/SLD3-m25-3Flag::HygroR dbf4-</i><br><i>m25::LEU2::dbf4Δ::KanMx/dbf4-m25::LEU2::dbf4Δ::KanMx</i>                                                                       | this study |
| yJLO163 | <i>SLD3-3xFlag::Hyg/SLD3-3xFlag::Hyg dbf4-</i><br><i>25A::LEU2::dbf4Δ::KanMx/dbf4-25A::LEU2::dbf4Δ::KanMx</i>                                                                                                                                       | this study |
| yJLO164 | <i>SLD3-3xFLAG/SLD3-m25-3xFlag::HyG dbf4-</i><br><i>25A::LEU2::dbf4Δ::KanMx/dbf4-25A::LEU2::dbf4Δ::KanMx</i>                                                                                                                                        | this study |
| yJLO165 | <i>HygroR::pTEF-sld3dpb11::DPB11 his3Δ1 leu2Δ0 met15Δ0 ura3Δ</i>                                                                                                                                                                                    | this study |
| yJLO70  | <i>HygroR::pTEF-sld3dpb11::DPB11 his3Δ1 leu2Δ0 met15Δ0 ura3Δ</i>                                                                                                                                                                                    | this study |
| yNLM91  | <i>sld3-m4-3Flag::HygroR (set3: T451A S456A S463A S466)</i>                                                                                                                                                                                         | this study |
| yNLM93  | <i>sld3-m5-3Flag::HygroR (set4: S493A T495A S497A S505A T507A</i>                                                                                                                                                                                   | this study |
| yNLM95  | <i>sld3-m2-3Flag::HygroR (set5: T582A S591A)</i>                                                                                                                                                                                                    | this study |
| yNLM97  | <i>sld3-m4-3Flag::HygroR (set6: S639A T642A T646A)</i><br><i>sld3-m7-3Flag::HygroR (set 4&amp;5: S493A T495A S497A S505A</i><br><i>T507A T582A S591A)</i>                                                                                           | this study |
| yNLM99  | <i>sld3-m10-3Flag::HygroR (Set4-6: S493A T495A S497A S505A</i><br><i>T507A T582A S591A S639A T642A T646A</i>                                                                                                                                        | this study |
| yNLM101 | <i>sld3-m18-3Flag::HygroR (set1-6: Y153F Y154F T370A T373A</i><br><i>T451A S456A S463A S466A S493A T495A S497A S505A</i><br><i>T507A T582A S591A S639A T642A T646A</i>                                                                              | this study |
| yNLM107 | <i>sld3-m20-3Flag::HygroR (Y153F Y154F T370A T373A T451A</i><br><i>S456A S463A S466A S493A T495A S497A S505A T507A</i><br><i>S521A S534A T582A S591A S639A T642A T646A)</i>                                                                         | this study |
| yNLM147 | <i>SLD3-m25-3Flag::HygroR (Y153F Y154F T370A T373A T451A</i><br><i>S456A S463A S466A S493A T495A S497A S505A</i><br><i>T507A S521A S534A T582A S591A T607A T609A S618A T631A</i><br><i>T638A S639A T642A T646A)</i>                                 | this study |
| yNLM133 | <i>T638A S639A T642A T646A)</i>                                                                                                                                                                                                                     | this study |
| yJLO180 | <i>SLD3-3Flag::HygroR DUN1-TAP::HISMx</i><br><i>SLD3-3Flag::HygroR rad53Δ::KanMx sml1Δ::LEU2 DUN1-</i><br><i>TAP::HISMx</i>                                                                                                                         | this study |
| yJLO181 | <i>SLD3-m25::HygroR dbf4-m25::LEU2::dbf4Δ::KanMx DUN1-</i><br><i>TAP::HISMx</i>                                                                                                                                                                     | this study |
| yJLO182 | <i>TAP::HISMx</i>                                                                                                                                                                                                                                   | this study |
| yJLO187 | <i>SLD3-3Flag::HygroR DBF4-9Myc::TRP</i>                                                                                                                                                                                                            | this study |
| yJLO188 | <i>SLD3-m25-3Flag::HygroR dbf4-m25-9Myc::TRP</i>                                                                                                                                                                                                    | this study |
| yJLO189 | <i>SLD3-3Flag::HygroR DBF4-9Myc::TRP rad53-K227A</i><br><i>sld3-m21D3FLAG::HygroR (T451D S456D S463D S466D S493D</i><br><i>T495D S497D S505D T507D S521D S534D</i><br><i>T582D S591D T607D T609D S618D T631D T638D S639D T642D</i><br><i>T646D)</i> | this study |
| yJLO190 | <i>T646D)</i>                                                                                                                                                                                                                                       | this study |

|         |                                                                                                                        |                   |
|---------|------------------------------------------------------------------------------------------------------------------------|-------------------|
| yJLO192 | <i>SLD3-m25-3Flag::HygroR dbf4-m25::LEU2::dbf4Δ::KanMx rad53Δ::KanMx sml1::LEU2</i>                                    | this study        |
| yJLO193 | <i>CDC7-TAP::HIS3 SLD3-3Flag::HygroR DBF4-9Myc::TRP</i>                                                                | this study        |
| yJLO194 | <i>CDC7-TAP::HIS3 SLD3-3Flag::HygroR dbf4-m25-9Myc::TRP SLD3-m25-3Flag::HygroR dbf4-m25::LEU2 rad53Δ::HIS3 [rad53-</i> | this study        |
| yJLO260 | <i>R70A,R605A::URA3]</i>                                                                                               | this study        |
| yJLO261 | <i>SLD3-m25-3Flag::HygroR dbf4-m25::LEU2 rad53Δ::HIS3 [RAD53::URA3]</i>                                                | this study        |
| yJLO262 | <i>SLD3-3Flag::HygroR DBF4 rad53Δ::HIS3 [rad53-</i>                                                                    | this study        |
| yJLO263 | <i>R70A,R605A::URA3]</i>                                                                                               | this study        |
| yJLO264 | <i>SLD3-3Flag::HygroR DBF4 rad53Δ::HIS3 [RAD53::URA3]</i>                                                              | this study        |
| yJLO265 | <i>SLD3-m25-3Flag::HygroR DBF4 rad53Δ::HIS3 [rad53-</i>                                                                | this study        |
|         | <i>R70A,R605A::URA3]</i>                                                                                               | this study        |
|         | <i>SLD3-3Flag::HygroR dbf4-m25::LEU2 rad53Δ::HIS3 [rad53-</i>                                                          | this study        |
|         | <i>R70A,R605A::URA3]</i>                                                                                               | this study        |
|         | <i>rad52Δ::KanMx</i>                                                                                                   | Deletion Library  |
|         | <i>pGal1-10-URA3-DBF4-Morf::URA3 [2μ]</i>                                                                              | Open Biosystems   |
|         |                                                                                                                        | TAP Library       |
|         | <i>DPB11-TAP::HIS3Mx</i>                                                                                               | (Weissman&O'Shea) |

### Supplemental Table S3

| Plasmid name   | Relevant genotype                                                                                                                                                                                                                                       |
|----------------|---------------------------------------------------------------------------------------------------------------------------------------------------------------------------------------------------------------------------------------------------------|
| pJLO2          | <i>SLD3-3Flag::HygroR</i> (tagging construct)                                                                                                                                                                                                           |
| pJLO3          | <i>sld3-3Flag::HygroR</i> (set3: T451A S456A S463A S466A)                                                                                                                                                                                               |
| pJLO4          | <i>sld3-3Flag::HygroR</i> (set4: S493A T495A S497A S505A T507A)                                                                                                                                                                                         |
| pJLO5          | <i>sld3-3Flag::HygroR</i> (set6: S639A T642A T646A)                                                                                                                                                                                                     |
| pNM10          | <i>sld3-m2::HygroR</i> (set5: T582A S591A)                                                                                                                                                                                                              |
| pNM11          | <i>sld3-m7::HygroR</i> (set4&5: S493A T495A S497A S505A T507A T582A S591A)                                                                                                                                                                              |
| pNM12          | <i>sld3-m10::HygroR</i> (set4-6: S493A T495A S497A S505A T507A T582A S591A S639A T642A T646A)                                                                                                                                                           |
| pNM13          | <i>sld3-m14::HygroR</i> (set3-6: T451A S456A S463A S466A S493A T495A S497A S505A T507A T582A S591A S639A T642A T646A)                                                                                                                                   |
| pNM15          | <i>sld3-m16::HygroR</i> (set2-6: T370A T373A T451A S456A S463A S466A S493A T495A S497A S505A T507A T582A S591A S639A T642A T646A)                                                                                                                       |
| pNM16          | <i>sld3-m18::HygroR</i> (set1-6: Y153F Y154F T370A T373A T451A S456A S463A S466A S493A T495A S497A S505A T507A T582A S591A S639A T642A T646A)                                                                                                           |
| pNM19          | <i>sld3-m21::HygroR</i> (Y153F Y154F T370A T373A T451A S456A S463A S466A S493A T495A S497A S505A T507A T582A S591A T607A T609A S618A S639A T642A T646A)                                                                                                 |
| pNM21          | <i>sld3-m20::HygroR</i> (Y153F Y154F T370A T373A T451A S456A S463A S466A S493A T495A S497A S505A T507A S521A S534A T582A S591A S639A T642A T646A)                                                                                                       |
| pNM22          | <i>sld3-m23::HygroR</i> (Y153F Y154F T370A T373A T451A S456A S463A S466A S493A T495A S497A S505A T507A T582A S591A T607A T609A S618A T631A T638A S639A T642A T646A)                                                                                     |
| pNM23          | <i>SLD3-m25::HygroR</i> (Y153F Y154F T370A T373A T451A S456A S463A S466A S493A T495A S497A S505A T507A S521A S534A T582A S591A T607A T609A S618A T631A T638A S639A T642A T646A)                                                                         |
| pNM25          | $\Delta$ 109N- <i>Dbf4::LEU2</i> (pRS305)                                                                                                                                                                                                               |
| pJLO12         | <i>DBF4::LEU2</i> (pRS305)                                                                                                                                                                                                                              |
| pJLO13         | <i>dbf4-m2::LEU2</i> (T171A T175A)                                                                                                                                                                                                                      |
| pNM28          | <i>dbf4-m1::LEU2</i> (S84A)                                                                                                                                                                                                                             |
| pNM29          | <i>dbf4-m2::LEU2</i> (S84A S235A)                                                                                                                                                                                                                       |
| pNM30          | <i>dbf4-m3::LEU2</i> (S84A S235A T473A)                                                                                                                                                                                                                 |
| pNM33          | <i>dbf4-m4::LEU2</i> (S84A S235A S356A T473A)                                                                                                                                                                                                           |
| pJLO15         | <i>dbf4-m6::LEU2</i> (S84A Y139F S235A S356A T473A S632A)                                                                                                                                                                                               |
| pJLO16         | <i>dbf4-m27::LEU2</i> (S3A T5A S11A T16A T18A S29A T30A T31A S40A T50A T51A S53A S59A S84A S92A T95A T105A T114A S124A T131A Y139F T171A T175A S235A S356A T473A S632A) <i>SacII/BsaBI</i> fragment from pUC57 subcloned into pJLO15 <i>SacII/BsaBI</i> |
| pJLO17         | <i>dbf4-m25::LEU2</i> (T5A T16A T18A S29A T30A T31A S40A T50A T51A S53A S59A S84A S92A T95A T105A T114A S124A T131A Y139F T171A T175A S235A S356A T473A S632A)                                                                                          |
| pJLO28         | <i>GST-Sld3-3Flag</i> pDEST15                                                                                                                                                                                                                           |
| pJLO29         | <i>GST-Sld3-m25-3Flag</i> pDEST15                                                                                                                                                                                                                       |
| pJLO31         | <i>GST-dbf4-6xHis</i> pDEST15                                                                                                                                                                                                                           |
| pJLO32         | <i>GST-dbf4-m25-6xHis</i> pDEST15                                                                                                                                                                                                                       |
| pJLO33         | <i>sld3-m21D-3Flag::HygroR</i> (T451D S456D S463D S466D S493D T495D S497D S505D T507D S521D S534D T582D S591D T607D T609D S618D T631D T638D S639D T642D T646D)                                                                                          |
| pGal-HO        | <i>pGal-HO::URA3</i> (cen)                                                                                                                                                                                                                              |
| rad53-FHA1FHA2 | <i>rad53 R70A R605A:URA3</i> (cen)                                                                                                                                                                                                                      |
